# Supplementary material
Source: bioRxiv or medRxiv preprint supplement (https://www.biorxiv.org/highwire/filestream/57587/field_highwire_adjunct_files/0/190041-1.pdf)
Supplement: Supplementary file [file 190041-1.pdf]

Root-to-tip distance (subs/site/year)

*Mycobacterium tuberculosis*  
Lineage 2

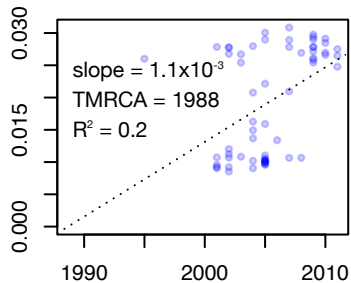

*Vibrio cholerae*

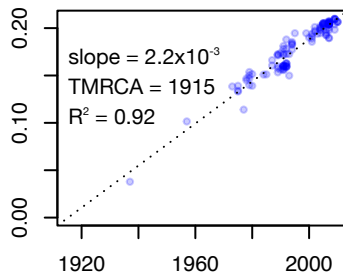

*Shigella dysenteriae*  
type 1

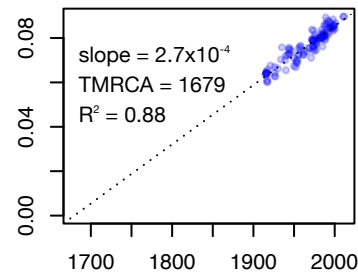

*Staphylococcus aureus*  
ST239

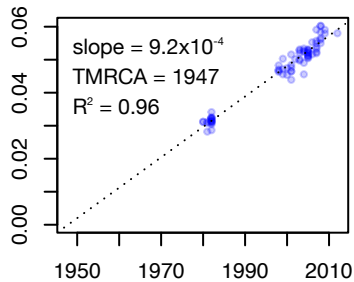

*Shigella dysenteriae*  
type 1 (global data set)

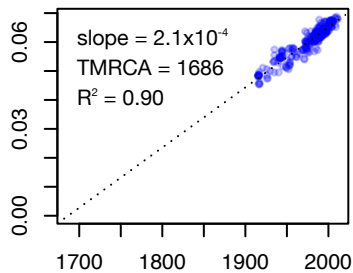

*Shigella dysenteriae*  
type 1 lineage IV

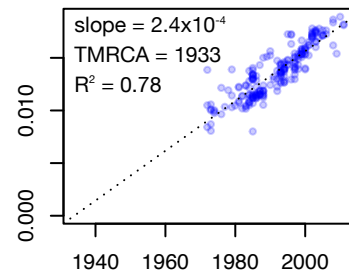

Sampling time (year)
